# Supplementary material for: Interplay among pain intensity, sleep disturbance and emotion in patients with non-specific low back pain
Source: PeerJ. 2017 May 16;5:e3282. doi: 10.7717/peerj.3282 (PMC5436560; doi:10.7717/peerj.3282)
Supplement: Data S1 [file peerj-05-3282-s001.xlsx]

## Sheet: Sheet1
No	Age	Gender 1M 2F	Height	Weight	BMI	Smoking	Coffe	Drinking	ODI	VAS	BAI	BDI	PSQI（total）	Subjective sleep quality	latency	duration	efficiency	disturbance	medicationDaytime dysfunction	Daytime dysfunction
1	33	1	1.59	63	24.9199	1	1	0	42	2	19	4	3	1	0	1	0	0	0	1		1
2	56	2	1.65	50	18.3391	0	0	0	42	6	15	15	9	2	2	1	1	2	1	0		1
3	51	2	1.71	66	22.5981	0	0	0	22	3	25	12	7	2	1	1	1	1	0	1		1
4	58	1	1.42	67	33.2275	0	0	1	48	4	27	7	8	2	1	1	1	1	1	1		1
5	40	1	1.48	73	33.3272	0	0	0	42	3	13	6	5	1	1	0	1	2	0	0		1
6	43	1	1.55	78	32.4662	0	1	1	40	2	1	11	11	3	3	0	0	2	2	1		1
7	38	2	1.56	80	32.7919	0	1	0	58	2	10	9	5	1	1	1	0	1	0	1		1
8	45	1	1.67	50	17.9282	0	0	0	30	6	17	9	10	1	1	1	1	3	1	2		1
9	35	2	1.68	52	18.3768	0	0	0	12	5	12	9	5	1	1	0	0	1	0	2		1
10	58	1	1.78	62	19.5682	0	0	0	30	4	27	10	7	1	1	1	1	0	0	3		1
11	46	1	1.45	68	32.3424	0	1	0	52	7	13	12	12	2	2	1	1	1	2	3		1
12	33	2	1.45	54	25.7778	0	0	0	22	3	17	7	6	1	0	1	1	0	1	2		1
13	48	2	1.51	74	32.4622	0	0	0	50	6	3	16	8	3	2	0	0	2	1	0		1
14	46	1	1.61	73	28.1625	0	0	0	32	4	22	7	7	1	2	0	0	3	0	1		1
15	52	1	1.67	51	18.2868	1	0	0	16	3	18	4	3	0	0	1	0	1	0	1		1
16	53	2	1.67	52	18.9292	0	0	1	42	4	11	8	7	1	0	1	1	1	1	2		1
17	28	2	1.75	59	19.1358	0	0	0	12	5	7	3	4	0	1	1	1	0	0	1		1
18	58	2	1.4	55	28.0618	0	0	0	24	7	29	4	10	2	1	2	1	1	0	3		1
19	43	1	1.51	75	32.8933	0	0	0	54	7	34	10	9	2	2	1	1	1	1	1		1
20	49	2	1.51	58	25.8876	0	0	0	28	4	6	8	3	1	1	0	0	1	0	0		1
21	53	2	1.56	45	18.5178	0	1	0	36	6	7	14	9	2	2	1	1	1	1	1		1
22	43	2	1.61	49	19.2336	0	0	0	4	2	6	12	10	0	3	1	0	3	2	1		1
23	45	1	1.73	60	20.0474	0	0	0	22	4	11	10	6	1	0	1	1	1	1	1		1
24	33	1	1.78	65	20.5151	0	0	0	12	5	5	4	4	1	0	1	0	1	0	1		1
25	38	1	1.43	61	29.8303	0	0	0	54	4	7	4	6	1	1	1	1	1	0	1		1
26	43	1	1.48	74	33.7838	0	0	0	50	3	4	12	8	2	1	2	1	1	1	0		1
27	48	1	1.54	63	26.5643	0	0	0	18	4	4	5	3	0	1	1	0	0	0	1		1
28	53	2	1.54	64	26.5021	0	0	1	66	3	30	7	7	1	1	1	1	1	0	2		1
29	57	2	1.61	51	19.2336	1	0	0	24	4	28	3	2	0	0	0	0	1	0	1		1
30	28	2	1.68	75	26.3958	0	1	1	42	6	20	17	7	1	2	1	0	1	1	1		1
31	32	1	1.78	65	20.5151	0	0	0	10	5	4	7	2	0	0	1	1	0	0	0		1
32	38	2	1.38	51	26.8962	0	1	0	8	6	10	9	4	0	0	1	1	0	1	1		1
33	42	2	1.44	63	30.1788	0	0	0	68	7	18	14	7	1	1	2	1	1	0	1		1
34	48	2	1.69	78	27.0842	0	0	0	36	6	3	7	4	1	1	0	0	1	0	1		1
35	64	2	1.54	54	22.5466	0	0	0	54	3	7	14	7	1	2	1	1	1	0	1		1
36	50	1	1.65	52	19.1001	1	0	0	18	5	12	7	3	1	1	0	0	1	0	0		1
37	45	2	1.65	54	19.7232	0	0	0	32	4	18	9	6	1	1	1	1	1	0	1		1
38	45	2	1.7	80	27.4286	0	0	0	42	4	19	4	8	2	1	1	1	2	0	1		1
39	60	1	1.8	69	21.2963	0	0	0	52	6	7	4	3	0	0	1	0	1	0	1		1
40	47	1	1.67	75	26.8923	0	0	0	44	6	6	2	7	1	1	1	1	1	1	1		1
41	50	1	1.52	54	23.3726	0	0	0	22	6	15	8	2	0	1	0	0	1	0	0		1
42	52	1	1.57	46	18.662	0	0	0	20	4	3	1	9	1	3	1	1	1	0	2		1
43	28	2	1.57	67	27.0538	1	0	1	30	3	14	15	10	1	2	2	1	1	0	3		1
44	60	1	1.68	58	20.5499	0	0	0	50	6	18	7	3	1	1	0	0	1	0	0		1
45	40	2	1.68	69	24.3911	1	0	0	48	3	14	13	10	2	3	1	1	1	0	2		1
46	30	2	1.73	64	21.4619	0	1	0	10	7	18	3	3	1	0	0	0	1	0	1		1
47	53	2	1.58	69	27.852	0	0	1	40	5	24	18	7	1	3	1	0	1	0	1		1
48	24	1	1.49	50	22.5215	0	0	0	18	7	9	0	0	0	0	0	0	0	0	0		1
49	45	1	1.58	78	31.245	0	1	0	32	4	3	10	8	1	1	1	1	1	1	2		1
50	47	1	1.63	70	26.3465	1	0	1	42	7	8	3	11	2	2	1	1	1	1	3		1
51	40	2	1.59	54	21.1927	0	0	0	30	3	18	11	5	1	2	1	0	0	0	1		1
52	45	2	1.46	58	27.1918	0	0	1	42	3	19	13	9	2	2	1	1	1	1	1		1
53	26	1	1.66	58	21.048	1	0	0	52	7	7	9	3	1	1	0	0	1	0	0		1
54	47	1	1.61	73	28.1625	0	0	0	32	5	8	10	8	1	3	1	1	1	0	1		1
55	58	2	1.42	73	36.0961	0	1	0	20	2	18	3	0	0	0	0	0	0	0	0		1
56	45	1	1.52	85	36.7902	0	0	0	46	5	5	6	5	0	1	1	1	1	0	1		1
57	49	1	1.57	49	19.8791	0	1	0	18	1	10	12	6	0	1	2	1	0	0	2		1
58	38	1	1.62	55	20.9572	0	0	0	44	4	9	3	5	1	1	1	0	1	0	1		1
59	48	2	1.63	57	21.6128	0	0	0	38	3	18	14	8	1	1	2	1	1	1	1		1
60	49	1	1.73	67	22.3863	1	0	0	24	3	26	10	6	1	2	1	1	1	0	0		1
61	64	2	1.73	68	22.7244	0	1	0	46	6	13	15	5	1	1	0	0	2	0	1		1
62	53	2	1.4	72	36.6231	0	0	1	26	2	19	8	3	1	1	0	0	1	0	0		1
63	28	1	1.5	84	37.3333	0	1	0	40	3	4	7	6	1	1	1	1	1	0	1		1
64	58	1	1.55	48	19.9792	0	1	0	14	6	8	2	2	0	0	1	1	0	0	0		1
65	37	1	1.61	54	20.8325	0	0	0	12	3	18	5	3	1	0	1	0	0	0	1		1
66	50	1	1.66	59	21.4109	0	0	0	42	7	1	3	9	1	1	2	1	1	1	2		1
67	49	2	1.66	62	22.571	0	0	0	28	7	4	6	4	1	1	0	0	1	0	1		1
68	64	2	1.71	67	22.921	1	0	0	62	6	29	9	7	2	0	2	1	2	0	0		1
69	59	2	1.37	72	38.1869	0	1	0	14	5	17	1	1	0	0	0	0	0	0	1		1
70	55	2	1.42	77	38.4099	0	0	1	48	5	28	5	6	1	1	1	1	1	0	1		1
71	26	2	1.47	44	20.3428	0	0	0	42	3	17	5	3	1	0	1	0	1	0	0		1
72	50	2	1.54	48	20.9644	0	0	0	12	7	10	3	2	0	0	1	1	0	0	0		1
73	48	1	1.64	58	21.5645	0	0	0	48	6	12	6	9	2	1	1	1	2	0	2		1
74	53	2	1.64	60	22.7583	0	0	1	20	4	7	7	3	0	1	1	0	1	0	0		1
75	50	1	1.74	70	23.1206	1	0	0	30	5	18	3	6	1	1	1	1	1	0	1		1
76	30	1	1.8	76	23.4568	0	0	0	42	2	29	7	4	1	1	1	0	1	0	0		1
77	60	1	1.45	81	38.5256	0	0	0	38	4	7	9	8	2	0	1	1	2	1	1		1
78	42	2	1.45	43	20.8889	0	1	0	48	4	12	13	10	2	1	1	1	2	1	2		1
79	45	1	1.55	52	21.6441	0	0	0	38	4	8	12	3	0	0	1	0	1	0	1		1
80	47	1	1.61	58	22.3757	0	0	0	48	5	9	12	9	3	1	1	0	1	1	2		1
81	24	1	1.66	64	23.2254	0	1	0	28	2	14	8	5	1	1	0	0	1	0	2		1
82	50	1	1.71	69	23.597	0	0	1	38	4	18	12	5	0	1	1	1	1	0	1		1
83	41	1	1.76	81	26.1493	0	0	0	40	2	24	19	8	1	1	1	0	2	1	2		1
84	36	2	1.38	46	24.4511	0	0	0	20	3	12	6	6	1	1	1	1	1	0	1		1
85	48	1	1.48	56	25.5661	0	0	0	50	6	12	8	8	2	1	1	2	1	0	1		1
86	50	1	1.53	51	21.7865	0	0	0	20	5	5	3	3	1	0	0	0	1	0	1		1
87	21	1	1.59	64	25.3155	0	1	1	38	3	7	10	8	2	3	1	0	2	0	0		1
88	60	1	1.64	58	21.5645	0	0	0	36	2	14	2	2	1	0	0	0	1	0	0		1
89	47	1	1.69	67	23.4586	0	0	0	48	4	20	8	7	2	0	1	1	2	0	1		1
90	37	1	1.75	74	24.1633	0	0	0	46	5	20	4	8	2	1	1	1	1	1	1		1
91	55	2	1.75	69	22.2222	0	0	0	14	2	23	1	4	0	1	1	1	1	0	0		1
92	47	2	1.55	72	29.6875	0	0	0	62	5	18	9	6	1	1	1	1	1	0	1		1
93	32	1	1.52	50	21.6413	0	0	0	22	6	8	11	3	1	1	0	0	1	0	0		1
94	58	1	1.58	56	22.4323	0	0	0	38	6	12	4	3	1	0	1	0	1	0	0		1
95	36	1	1.63	71	26.7229	0	0	1	38	4	20	16	11	2	3	1	1	2	1	1		1
96	30	2	1.64	63	23.4586	0	0	0	34	3	14	3	5	1	0	1	1	1	0	1		1
97	36	1	1.64	73	27.1416	0	0	0	44	6	22	12	9	3	1	1	1	2	1	0		1
98	50	2	1.75	54	17.9012	0	1	0	12	2	23	7	5	1	1	1	1	0	0	1		1
99	46	1	1.6	65	25.3906	0	0	0	40	4	28	8	7	1	1	1	2	1	0	1		1
100	51	2	1.55	63	26.9531	0	0	1	38	4	11	10	8	2	2	1	1	1	1	0		1
101	32	2	1.53	52	22.0317	0	0	0	28	3	19	6	6	1	0	1	1	2	0	1		1
102	42	2	1.58	66	26.3465	0	0	1	54	6	13	10	7	2	1	1	0	2	1	0		1
103	48	2	1.53	53	22.8329	1	1	0	14	3	17	13	4	1	1	0	0	1	0	1		1
104	50	1	1.59	59	23.3377	0	0	0	32	4	20	2	9	2	1	1	0	2	1	2		1
105	58	2	1.44	44	21.1702	0	0	0	24	7	18	7	3	1	0	1	0	1	0	0		1
106	43	1	1.61	63	24.3046	0	0	0	30	4	19	7	9	3	1	2	1	0	0	2		1
107	54	2	1.46	63	29.8233	0	0	0	46	7	10	10	9	1	1	2	1	1	1	2		1
108	38	2	1.51	50	22.1893	0	0	1	30	3	5	7	5	1	1	1	0	1	0	1		1
109	44	2	1.61	65	25.0399	1	0	0	38	5	13	8	8	1	2	2	1	2	0	0		1
110	48	1	1.68	56	19.8413	0	0	0	10	3	14	2	0	0	0	0	0	0	0	0		1
111	54	1	1.55	51	21.2279	0	1	0	48	4	10	9	6	2	1	1	0	1	0	1		1
112	43	1	1.5	67	29.7778	0	0	0	56	7	17	11	9	2	1	2	1	1	1	1		1
113	28	2	1.4	48	24.7325	0	0	0	16	3	20	11	5	1	0	1	1	1	0	1		1
114	33	2	1.41	47	23.9257	0	0	0	36	6	23	3	8	2	1	1	1	2	0	1		1
115	28	1	1.55	53	22.0604	0	0	0	28	3	15	3	4	0	1	1	1	0	0	1		1
116	43	2	1.55	60	25	0	0	0	46	6	7	6	7	1	1	1	1	1	0	2		1
117	47	1	1.65	72	26.4463	0	0	1	28	7	12	9	7	2	2	1	0	1	0	1		1
118	50	1	1.6	60	23.4375	0	0	0	10	5	14	10	8	1	2	1	1	2	1	0		1
119	59	2	1.51	62	27.1203	0	0	0	18	6	22	5	7	1	1	1	1	2	0	1		1
120	60	1	1.51	51	22.3674	0	0	0	28	7	16	13	3	1	0	1	0	0	0	1		1
121	52	1	1.56	57	23.4221	0	1	0	28	3	28	10	8	2	1	1	0	2	0	2		1
122	53	2	1.46	48	22.806	0	0	0	44	2	12	5	3	1	0	1	0	0	0	1		1
123	42	2	1.51	58	25.4767	0	0	0	46	4	4	7	5	1	1	1	0	1	0	1		1
124	46	1	1.62	63	24.0055	0	0	0	56	3	16	5	8	1	1	2	1	1	1	1		1
125	41	1	1.57	59	23.9361	0	0	0	26	3	24	2	7	0	1	1	1	1	0	3		1
126	21	2	1.52	61	26.3702	0	0	1	52	6	18	5	7	1	2	1	1	1	0	1		1
127	60	1	1.77	66	21.0667	0	1	1	22	5	5	3	1	1	0	0	0	0	0	0		1
128	51	2	1.47	62	28.9993	0	0	0	40	4	9	8	6	1	1	1	1	1	0	1		1
129	47	1	1.55	64	26.6389	0	0	1	36	7	14	5	9	2	1	1	1	2	1	1		1
130	60	1	1.52	47	20.3428	0	0	0	36	4	10	6	4	1	0	1	0	1	0	1		1
131	44	1	1.55	62	25.8065	0	1	0	44	6	2	12	9	2	1	2	1	1	0	2		1
132	49	1	1.54	49	20.6612	0	0	0	22	2	19	0	2	1	0	0	0	0	0	1		1
133	53	2	1.64	62	23.1084	1	0	0	32	3	9	4	5	1	1	1	0	1	0	1		1
134	50	1	1.74	59	19.4874	0	0	0	16	6	7	2	1	1	0	0	0	0	0	0		1
135	45	1	1.79	85	26.5285	0	0	1	38	4	14	3	7	2	1	1	1	2	0	0		1
136	58	1	1.45	62	29.4887	0	0	1	16	5	15	1	10	2	2	1	0	2	1	2		1
137	39	2	1.45	42	20.4444	0	0	0	14	3	10	5	3	1	0	1	0	1	0	0		1
138	43	1	1.55	61	25.3902	0	0	0	52	5	29	10	7	2	1	1	0	2	0	1		1
139	49	1	1.6	47	18.3594	0	1	0	10	7	17	2	1	0	0	0	0	0	0	1		1
140	54	1	1.65	73	26.8136	0	0	0	40	4	12	13	7	1	1	2	1	1	0	1		1
141	50	1	1.65	78	28.6501	0	0	1	48	3	16	3	7	2	0	1	0	1	1	2		1
142	44	2	1.7	67	23.1837	0	0	0	38	3	22	5	6	2	1	1	0	1	0	1		1
143	58	1	1.6	73	28.5156	1	0	0	48	6	17	20	7	2	1	1	0	2	0	1		1
144	58	1	1.46	46	21.58	0	0	0	16	3	10	5	2	1	1	0	0	0	0	0		1
145	44	1	1.52	60	25.9695	0	0	0	36	5	33	6	8	1	1	1	1	3	0	1		1
146	49	1	1.57	44	17.8506	1	0	0	16	7	4	1	1	1	0	0	0	0	0	0		1
147	47	1	1.52	52	22.5069	0	1	0	52	3	8	6	6	1	1	2	1	1	0	0		1
148	50	1	1.67	78	27.968	0	0	1	8	6	9	11	9	2	3	1	1	2	0	0		1
149	45	1	1.72	63	21.2953	0	0	0	20	2	16	2	1	0	0	0	0	1	0	0		1
150	34	2	1.42	50	24.9896	0	0	1	44	5	10	10	8	2	2	1	1	1	0	1		1
151	58	1	1.43	54	26.4072	0	0	0	14	3	6	1	1	0	0	0	0	0	0	1		1
152	44	1	1.48	59	26.9357	0	1	0	48	4	33	5	7	1	2	1	1	2	0	0		1
153	48	1	1.53	55	23.4952	0	0	0	18	3	8	12	1	0	0	0	0	0	0	1		1
154	53	2	1.53	46	20.0288	0	0	0	26	4	2	2	8	2	1	1	0	2	0	2		1
155	63	1	1.63	84	31.6158	0	0	0	60	4	17	5	9	2	0	2	1	1	1	2		1
156	26	1	1.68	72	25.5102	0	0	0	26	3	26	3	2	0	1	0	0	0	0	1		1
157	55	2	1.69	43	15.1936	0	0	1	8	6	17	8	8	2	1	2	1	1	0	1		1
158	36	1	1.59	43	17.0088	1	0	0	14	4	25	10	5	1	2	1	0	1	0	0		1
159	40	2	1.39	42	22.1836	0	0	0	34	4	14	13	7	1	2	1	0	2	0	1		1
160	45	1	1.49	68	30.6293	0	0	0	44	7	30	21	11	2	2	1	1	2	1	2		1
161	51	2	1.49	47	21.5045	0	0	1	40	3	20	3	3	1	0	1	0	1	0	0		1
162	55	2	1.54	72	30.0621	0	0	0	26	6	7	10	7	3	1	1	0	1	0	1		1
163	64	1	1.66	81	29.3947	0	0	0	18	4	12	2	1	1	0	0	0	0	0	0		1
164	45	1	1.51	46	20.1746	0	1	0	34	4	17	1	6	1	1	2	0	0	0	2		1
165	59	1	1.46	62	29.0861	0	0	0	42	7	18	12	8	2	1	1	0	1	1	2		1
166	58	1	1.51	58	25.4375	0	0	0	22	4	5	8	2	0	0	0	0	1	0	1		1
167	43	1	1.62	65	24.7676	0	0	0	32	4	31	4	7	2	1	2	0	1	0	1		1
168	49	2	1.46	45	21.4903	0	0	0	32	4	5	2	3	1	1	0	0	1	0	0		1
169	50	1	1.56	49	20.1348	0	0	0	46	4	4	20	6	2	1	1	0	1	0	1		1
170	62	2	1.57	71	28.578	0	0	0	46	6	15	1	10	2	3	1	1	2	1	0		1
171	26	1	1.67	61	21.8724	0	1	0	20	5	12	2	2	1	0	0	0	1	0	0		1
172	32	1	1.72	80	27.0416	0	0	0	44	5	18	6	7	2	1	2	1	1	0	0		1
173	36	1	1.77	57	18.194	0	0	0	20	5	7	2	3	1	1	0	0	1	0	0		1
174	41	1	1.63	62	23.3355	1	0	1	28	4	28	16	4	1	1	1	0	1	0	0		1
175	45	1	1.47	67	31.0056	0	0	0	48	7	30	0	9	1	2	2	1	2	0	1		1
176	51	1	1.53	56	23.9224	0	0	0	26	5	3	5	4	1	1	1	0	1	0	0		1
177	47	1	1.58	79	31.6456	0	0	1	46	7	24	6	10	2	3	1	1	1	1	1		1
178	64	1	1.63	55	20.7008	0	1	0	52	6	12	4	4	1	1	1	0	1	0	0		1
179	44	1	1.68	72	25.5102	0	0	1	6	4	27	3	8	2	2	1	1	1	0	1		1
180	59	1	1.63	75	28.2284	0	0	0	36	2	28	17	10	3	1	1	0	2	1	2		1
181	39	2	1.64	57	21.3578	0	1	0	36	6	21	3	5	1	1	2	1	0	0	0		1
182	43	2	1.4	62	31.8668	0	0	0	46	6	32	2	7	1	1	2	1	1	0	1		1
183	48	2	1.45	49	23.1111	0	0	0	14	5	8	7	2	1	1	0	0	0	0	0		1
184	53	2	1.5	64	28.3039	0	0	0	44	6	4	12	4	2	0	1	0	1	0	0		1
185	52	2	1.55	74	30.4688	0	0	0	54	4	25	1	9	1	3	1	1	2	1	0		1
186	26	2	1.6	54	21.3039	0	0	0	24	7	14	0	4	1	1	0	0	1	0	1		1
187	55	2	1.42	56	27.7662	0	1	1	36	5	14	10	6	2	0	1	1	1	0	1		1
188	37	2	1.7	56	19.5918	0	0	1	26	2	14	17	6	2	1	1	0	1	0	1		1
189	41	2	1.76	62	20.1459	0	0	0	20	4	26	11	8	1	2	1	1	1	0	2		1
190	46	2	1.41	67	33.3083	0	0	0	54	7	30	14	8	2	1	1	0	1	1	2		1
191	50	2	1.46	72	33.3319	0	0	0	44	6	7	4	2	0	1	0	0	1	0	0		1
192	58	1	1.56	83	34.1059	0	0	0	44	4	6	6	6	2	1	1	0	1	0	1		1
193	24	2	1.56	43	18.132	0	0	0	32	5	10	7	3	1	0	1	0	1	0	0		1
194	45	2	1.61	49	19.2336	0	0	1	42	5	13	2	8	1	2	1	1	2	0	1		1
195	53	2	1.66	55	20.1771	0	0	0	26	7	21	12	6	2	1	1	0	1	0	1		1
196	39	2	1.73	61	20.5151	0	0	0	28	6	13	4	3	1	0	1	0	1	0	0		1
197	43	1	1.43	70	34.2315	0	1	0	16	7	8	7	4	2	0	1	0	1	0	0		1
198	48	2	1.43	73	35.1534	0	1	0	6	3	32	8	8	1	1	2	1	2	0	1		1
199	54	1	1.53	82	35.0293	1	0	0	14	4	36	12	8	2	1	2	1	1	0	1		1
200	52	1	1.58	47	18.8271	0	0	1	52	7	20	12	6	1	1	1	0	2	0	1		1
201	52	2	1.46	68	31.5776	0	0	0	40	3	13	10	7	2	2	1	0	1	1	0		1
202	60	1	1.61	82	31.6346	0	1	1	48	5	30	8	7	1	2	1	1	2	0	0		1
203	55	2	1.62	45	17.5697	1	0	0	26	2	13	10	5	2	0	1	0	1	0	1		1
204	37	1	1.73	56	18.7109	1	0	0	54	3	29	13	7	2	1	0	0	2	0	2		1
205	42	1	1.79	61	19.0381	0	0	0	54	7	33	4	7	2	1	1	1	1	0	1		1
206	48	1	1.46	67	31.4318	1	1	0	22	3	15	2	0	0	0	0	0	0	0	0		1
207	54	2	1.47	70	32.0291	0	0	0	40	6	2	3	8	1	1	2	1	1	0	2		1
208	52	2	1.52	75	32.05	0	0	0	40	6	10	5	3	1	1	0	0	1	0	0		1
209	44	1	1.63	85	31.9922	0	1	1	38	5	21	10	8	1	2	1	1	1	1	1		1
210	32	1	1.68	49	17.3611	0	0	1	48	7	10	11	9	2	2	1	1	1	1	1		1
211	38	1	1.75	56	18.2857	0	0	0	26	7	15	7	3	1	1	0	0	1	0	0		1
212	43	1	1.81	62	18.9249	0	0	0	24	5	29	15	7	1	2	1	1	1	0	1		1
213	48	2	1.41	63	31.4318	1	0	0	26	6	3	3	2	1	0	1	0	0	0	0		1
214	54	1	1.51	74	32.4547	0	1	0	46	5	12	3	5	1	1	1	0	2	0	0		1
215	52	1	1.57	79	32.05	0	0	0	44	6	22	4	9	2	0	2	1	1	1	2		1
216	44	2	1.57	81	32.3884	0	1	0	34	2	12	9	4	0	1	1	0	1	0	1		1
217	53	2	1.65	46	17.301	0	0	1	52	2	7	11	9	2	1	2	2	1	0	1		1
218	38	1	1.75	56	18.2857	0	0	0	14	2	11	4	6	2	1	1	0	2	0	0		1
219	43	1	1.81	61	18.6197	0	0	0	52	5	26	12	6	1	2	1	1	1	0	0		1
220	40	1	1.46	66	30.9627	1	0	0	24	7	14	10	2	1	0	0	0	1	0	0		1
221	52	1	1.51	73	32.0161	0	0	0	44	3	13	10	6	1	1	1	0	2	0	1		1
222	43	1	1.56	78	32.0513	0	0	1	44	6	15	11	8	2	1	1	1	2	0	1		1
223	26	1	1.62	84	32.0073	0	1	0	32	3	14	17	4	1	1	1	0	1	0	0		1
224	50	2	1.62	44	17.2111	0	0	1	36	5	22	10	6	1	1	2	0	1	0	1		1
225	56	1	1.72	55	18.5911	0	0	0	18	2	7	4	3	1	0	1	0	0	0	1		1
226	52	1	1.77	60	19.1516	0	0	0	34	5	25	7	1	0	0	0	0	1	0	0		1
227	46	1	1.42	66	32.7316	0	0	0	40	3	26	9	9	2	1	2	2	1	1	0		1
228	51	1	1.49	72	32.431	0	0	0	18	2	16	14	7	1	1	1	1	2	0	1		1
229	47	1	1.56	77	31.6404	0	0	1	42	5	12	13	7	1	2	1	1	1	0	1		1
230	60	2	1.58	77	30.863	0	0	0	10	7	7	2	2	0	0	0	0	1	0	1		1
231	45	2	1.63	43	16.2982	0	1	1	38	4	32	5	6	1	1	1	0	2	0	1		1
232	59	1	1.73	52	17.3745	1	0	0	24	2	19	6	3	1	1	0	0	1	0	0		1
233	39	1	1.79	58	18.1018	0	0	0	42	6	25	7	8	2	1	2	1	1	0	1		1
234	58	1	1.44	63	30.3819	0	0	0	22	3	9	2	4	1	0	1	0	1	0	1		1
235	49	1	1.49	69	31.0797	1	0	0	42	2	15	10	8	2	1	2	1	2	0	0		1
236	60	1	1.55	76	31.6337	0	0	0	32	2	27	4	2	0	0	0	0	1	0	1		1
237	36	1	1.6	81	31.6406	0	0	1	38	4	29	8	7	2	1	1	1	1	0	1		1
238	44	1	1.65	46	16.8962	0	0	1	36	7	30	2	8	1	2	1	1	2	0	1		1
239	53	2	1.66	47	17.4413	0	0	0	26	3	5	5	2	1	0	0	0	0	0	1		1
240	39	2	1.71	53	18.0785	0	0	0	44	4	3	2	11	2	1	2	1	2	1	2		1
241	33	2	1.37	59	31.2438	0	0	0	24	3	13	13	5	1	1	1	0	1	0	1		1
242	49	1	1.47	69	31.9311	1	0	0	30	4	13	10	9	2	1	2	1	2	0	1		1
243	51	1	1.53	75	32.039	0	0	0	22	4	23	6	4	1	1	1	0	1	0	0		1
244	52	1	1.58	81	32.4467	0	0	1	18	5	14	15	8	1	2	1	1	2	0	1		1
245	44	2	1.58	82	32.3685	1	0	0	16	4	10	22	4	0	0	0	1	2	0	1		1
246	59	1	1.69	53	18.5568	0	1	1	38	5	26	0	9	1	3	1	1	2	0	1		1
247	40	1	1.74	58	19.1571	1	0	0	44	3	6	4	3	1	0	0	0	1	0	1		1
248	44	2	1.74	60	19.9744	0	0	0	38	4	22	6	8	2	1	2	1	2	0	0		1
249	49	2	1.39	65	33.7577	0	0	1	36	2	7	8	10	2	1	2	1	2	1	1		1
250	47	1	1.5	76	33.7778	0	0	0	20	3	17	3	2	1	0	1	0	0	0	0		1
251	50	1	1.55	81	33.7149	1	0	1	40	6	10	17	7	1	0	2	1	2	0	1		1
252	24	2	1.55	81	33.5938	0	0	0	18	5	15	2	1	0	0	0	0	1	0	0		1
253	57	1	1.67	50	17.9282	0	0	0	46	3	16	4	3	0	1	1	0	1	0	0		1
254	50	1	1.72	57	19.2672	0	1	0	14	4	4	8	3	1	0	1	0	1	0	0		1
255	42	2	1.72	58	19.79	0	0	0	30	4	35	11	7	2	1	1	0	2	0	1		1
256	47	1	1.42	67	33.2275	0	0	0	50	4	27	2	7	1	1	1	1	2	0	1		1
257	51	1	1.48	74	33.7838	0	1	0	8	3	7	3	8	2	1	2	1	1	0	1		1
258	58	1	1.53	79	33.7477	1	0	0	26	5	11	8	4	1	1	1	0	1	0	0		1
259	46	2	1.53	79	33.6485	0	0	1	34	2	14	4	5	2	1	1	0	1	0	0		1
260	59	1	1.64	49	18.2183	1	0	0	32	5	31	11	8	1	3	1	2	1	0	0		1
261	35	2	1.64	50	18.9069	0	0	1	14	5	13	4	3	1	0	1	0	1	0	0		1
262	48	1	1.74	60	19.8177	0	0	0	38	4	7	5	6	1	0	1	0	2	1	1		1
263	45	1	1.81	65	19.8407	0	0	0	28	5	28	14	9	2	0	1	0	3	1	2		1
264	42	1	1.46	71	33.3083	0	1	0	34	4	7	4	2	1	0	1	0	0	0	0		1
265	48	1	1.51	76	33.3319	0	0	0	34	5	22	5	7	2	1	1	1	1	0	1		1
266	50	1	1.57	81	32.8614	0	0	0	18	5	8	4	3	1	1	1	0	0	0	0		1
267	44	1	1.62	46	17.5278	0	0	1	38	4	16	8	6	1	1	1	1	1	0	1		1
268	32	2	1.62	48	18.6453	0	0	1	46	7	39	16	7	1	2	1	1	1	0	1		1
269	59	1	1.72	57	19.2672	0	1	0	38	4	5	5	2	0	0	0	0	1	0	1		1
270	43	2	1.73	58	19.5682	0	0	0	44	5	6	9	6	2	1	0	0	2	0	1		1
271	58	1	1.43	69	33.7425	0	0	0	16	6	17	3	3	1	0	0	0	1	0	1		1
272	46	1	1.48	74	33.7838	0	0	0	52	3	21	6	7	2	1	1	1	1	0	1		1
273	51	1	1.55	79	32.8824	1	0	0	52	3	22	3	10	2	1	2	1	2	0	2		1
274	46	1	1.6	84	32.8125	0	0	0	40	3	7	4	5	1	1	0	0	3	0	0		1
275	50	2	1.6	47	18.3655	1	0	1	38	6	33	18	9	2	2	1	1	2	0	1		1
276	36	2	1.65	52	19.0311	0	0	0	60	2	4	10	6	1	2	1	1	1	0	0		1
277	41	2	1.71	56	19.3698	0	0	0	14	6	9	13	3	1	1	0	0	1	0	0		1
278	48	1	1.81	66	20.1459	0	1	0	20	7	31	13	9	2	2	1	1	2	0	1		1
279	50	2	1.41	67	33.7774	0	0	0	40	4	27	9	7	1	1	1	1	2	0	1		1
280	54	2	1.47	73	33.3276	0	0	1	48	7	23	11	8	2	1	2	1	1	0	1		1
281	59	2	1.52	78	33.6728	0	1	1	36	3	31	18	7	2	1	1	0	2	0	1		1
282	48	2	1.57	43	17.9089	1	0	0	34	4	32	11	10	2	1	2	1	1	1	2		1
283	53	2	1.62	48	18.6453	0	0	0	22	6	3	8	1	0	0	0	0	1	0	0		1
284	37	1	1.74	59	19.4874	0	0	0	40	5	9	3	5	1	1	1	0	1	0	1		1
285	53	2	1.74	60	19.9744	0	0	0	12	7	14	3	3	1	0	0	0	1	0	1		1
286	47	1	1.44	69	33.2755	0	0	0	26	4	7	7	7	1	1	1	1	2	0	1		1
287	52	1	1.49	76	34.2327	0	0	0	24	7	23	12	7	1	1	1	0	2	0	2		1
288	36	1	1.55	81	33.7149	0	1	0	22	3	25	15	8	2	1	1	1	1	0	2		1
289	46	2	1.55	81	33.5938	0	1	0	40	2	32	4	7	1	1	1	1	1	1	1		1
290	55	2	1.61	47	18.5078	0	0	1	18	2	38	8	7	2	1	1	1	1	0	1		1
291	62	1	1.71	56	19.1512	0	0	0	36	5	2	2	10	2	2	1	0	2	1	2		1
292	53	2	1.71	58	20.0155	0	0	0	54	1	10	4	7	2	2	1	1	1	0	0		1
293	45	1	1.43	67	32.7644	0	0	0	30	4	15	5	6	1	1	1	0	2	0	1		1
294	50	1	1.49	73	32.8814	0	1	0	40	2	6	7	9	2	1	1	0	2	1	2		1
295	60	2	1.49	73	32.8892	0	0	0	28	3	14	8	5	1	0	1	0	1	0	2		1
296	59	2	1.55	79	32.4219	0	0	1	46	6	10	15	7	2	1	2	1	1	0	0		1
297	45	1	1.65	48	17.6309	0	0	0	14	2	5	6	5	1	1	1	0	1	0	1		1
298	33	1	1.7	54	18.6851	0	0	1	40	4	21	8	8	2	1	2	1	1	0	1		1
299	38	2	1.72	55	18.8324	0	0	0	12	6	7	8	4	1	1	1	0	1	0	0		1
300	34	1	1.43	64	31.2974	0	0	0	52	4	12	1	7	2	2	0	0	2	0	1		1
301	56	1	1.48	71	32.4142	0	0	0	46	6	22	15	10	2	3	1	1	2	0	1		1
302	50	2	1.49	72	32.0459	0	1	1	14	3	28	8	8	1	3	1	1	1	0	1		1
303	57	1	1.6	81	31.6406	0	0	0	46	3	26	6	7	2	1	1	0	3	0	0		1
304	59	1	1.65	46	16.8962	0	0	1	20	6	21	18	4	1	1	1	0	1	0	0		1
305	45	1	1.7	52	17.9931	0	1	0	48	5	15	1	2	1	1	0	0	0	0	0		1
306	47	1	1.77	57	18.194	0	1	0	44	3	0	14	9	2	2	1	1	2	0	1		1
307	40	1	1.42	63	31.2438	0	0	0	22	6	8	10	5	1	1	1	0	1	0	1		1
308	43	2	1.42	64	31.4684	0	0	0	34	4	29	5	9	2	2	1	1	2	0	1		1
309	39	1	1.54	73	30.7809	0	0	0	20	7	18	4	4	1	1	0	0	1	0	1		1
310	46	2	1.54	75	31.6443	1	0	1	34	4	23	9	7	1	1	1	0	2	0	2		1
311	52	1	1.64	85	31.6032	0	0	0	6	2	9	1	8	1	1	1	0	2	1	2		1
312	51	1	1.71	49	16.7573	0	0	1	24	3	13	6	5	1	1	1	0	1	0	1		1
313	56	1	1.76	54	17.4329	0	0	1	42	5	33	11	9	2	1	2	1	1	0	2		1
314	33	2	1.76	57	18.6197	0	1	0	18	7	15	2	1	0	0	0	0	1	0	0		1
315	58	2	1.41	63	31.4318	0	0	0	26	4	17	19	8	2	2	1	1	2	0	0		1
316	58	1	1.51	72	31.5776	0	0	0	16	6	4	1	2	1	0	0	0	1	0	0		1
317	50	2	1.52	75	32.05	1	0	0	24	4	16	4	8	1	3	1	1	1	0	1		1
318	60	1	1.62	84	32.0073	0	0	0	22	7	18	10	7	2	2	1	0	2	0	0		1
319	59	1	1.67	49	17.5697	0	1	0	18	7	21	9	4	1	1	1	0	1	0	0		1
320	44	1	1.72	55	18.5911	0	0	0	48	3	10	5	6	1	1	1	1	1	0	1		1
321	46	2	1.72	56	19.1516	0	0	0	56	2	8	6	4	1	1	1	0	1	0	0		1
322	39	2	1.37	61	32.7316	0	1	0	36	4	7	7	6	2	1	1	1	1	0	0		1
323	43	1	1.48	73	33.3272	0	0	0	52	7	12	17	7	3	1	1	0	1	0	1		1
324	48	1	1.53	78	33.3205	1	0	0	20	3	13	3	6	1	1	2	1	1	0	0		1
325	53	2	1.53	79	33.6485	1	0	1	18	2	5	5	8	1	2	1	1	2	0	1		1
326	50	1	1.63	51	19.1953	0	0	0	16	6	8	3	2	0	1	0	0	1	0	0		1
327	40	1	1.68	56	19.8413	0	1	0	14	4	10	10	5	1	1	1	0	1	0	1		1
328	53	1	1.75	62	20.2449	0	1	0	42	7	31	15	11	1	1	2	1	3	1	2		1
329	46	2	1.75	64	20.9877	0	0	0	30	3	3	9	6	2	1	1	0	1	0	1		1
330	51	1	1.45	73	34.7206	1	0	0	36	4	5	11	8	2	1	0	0	1	1	3		1
331	47	1	1.5	78	34.6667	0	0	0	18	3	13	16	4	1	1	1	0	1	0	0		1
332	51	2	1.5	78	34.9636	0	0	1	34	5	18	3	4	1	1	1	0	1	0	0		1
333	46	2	1.55	44	18.75	0	0	0	28	2	15	7	4	1	1	1	0	1	0	0		1
334	48	2	1.61	50	19.5965	0	0	0	20	5	23	9	9	1	2	2	1	2	0	1		1
335	42	2	1.66	55	20.1771	1	0	1	48	6	32	9	7	1	3	1	0	1	0	1		1
336	38	2	1.71	60	20.6612	0	1	0	16	2	15	5	3	1	0	1	0	1	0	0		1
337	44	1	1.81	70	21.3669	0	0	0	4	4	1	2	8	2	1	2	1	1	0	1		1
338	62	1	1.46	75	35.1848	0	0	0	12	2	10	3	3	1	0	1	0	1	0	0		1
339	58	2	1.46	76	35.5248	0	1	0	36	4	15	8	5	1	2	1	0	1	0	0		1
340	60	1	1.57	86	34.8899	0	0	0	48	7	19	1	7	2	1	1	0	1	0	2		1
341	47	1	1.62	50	19.052	0	0	0	36	6	24	6	7	1	2	1	1	1	0	1		1
342	38	1	1.68	55	19.487	0	0	1	46	5	30	10	7	1	1	1	2	1	0	1		1
343	53	2	1.68	56	20.0474	0	0	0	22	2	17	5	4	1	1	1	0	1	0	0		1
344	58	1	1.78	67	21.1463	0	1	0	40	4	19	13	5	1	1	1	0	1	0	1		1
345	41	1	1.43	72	35.2095	0	0	0	48	2	4	10	11	2	2	1	1	2	1	2		1
346	44	1	1.48	77	35.1534	0	0	0	18	3	21	4	3	1	1	0	0	1	0	0		1
347	53	2	1.48	78	35.0293	0	0	1	44	3	16	12	7	2	2	1	0	2	0	0		1
348	30	1	1.59	46	18.1955	0	0	0	36	2	22	1	7	1	1	2	2	1	0	0		1
349	45	1	1.64	53	19.7055	1	0	1	24	5	26	5	6	1	2	1	1	1	0	0		1
350	45	1	1.69	58	20.3074	0	0	0	12	3	11	8	3	0	0	0	0	2	0	1		1
351	51	1	1.74	63	20.8086	0	0	0	30	3	36	8	6	2	1	1	0	1	0	1		1
352	53	1	1.79	68	21.2228	0	1	0	38	4	1	4	8	2	1	1	1	2	0	1		1
353	44	2	1.39	69	35.2045	0	0	0	16	2	8	6	5	1	1	1	0	1	0	1		1
354	58	1	1.5	78	34.6667	0	0	1	44	5	18	11	7	1	2	1	1	1	0	1		1
355	38	1	1.55	85	35.3798	0	0	0	12	3	14	0	4	1	1	1	0	0	0	1		1
356	43	1	1.6	49	19.1406	0	0	0	30	4	16	5	4	1	1	1	0	1	0	0		1
357	57	1	1.65	54	19.8347	0	0	0	28	7	28	16	7	3	1	1	0	2	0	0		1
358	53	1	1.7	59	20.4152	0	0	0	34	2	32	7	7	1	2	1	1	1	0	1		1
359	51	2	1.7	60	20.898	0	0	0	52	5	38	5	7	2	1	2	1	1	0	0		1
360	26	2	1.37	65	34.7153	0	0	0	44	4	6	5	3	1	0	1	0	1	0	0		1
361	30	2	1.42	72	35.1705	0	0	0	18	4	11	1	4	1	0	1	0	1	1	0		1
362	36	1	1.52	81	35.0589	0	0	1	48	3	15	3	5	1	0	1	0	2	0	1		1
363	41	2	1.52	80	34.8899	0	1	0	34	3	20	5	7	1	1	1	1	1	1	1		1
364	55	2	1.57	46	19.052	0	0	0	32	4	20	8	8	2	1	1	2	1	0	1		1
365	45	2	1.62	52	20.0796	0	0	0	20	6	4	9	4	1	0	1	0	1	0	1		1
366	46	1	1.73	62	20.7157	0	0	0	46	4	5	5	4	1	1	1	0	1	0	0		1
367	36	2	1.73	63	21.1463	1	0	0	54	6	1	8	9	2	1	2	2	1	0	1		1
368	60	2	1.38	68	35.2095	0	0	0	22	3	7	4	5	1	0	1	0	2	0	1		1
369	57	1	1.48	77	35.1534	1	0	1	22	6	12	16	7	1	2	1	1	2	0	0		1
370	43	1	1.53	83	35.4564	0	0	1	18	6	12	13	8	1	0	2	1	2	0	2		1
371	49	1	1.58	47	18.8271	0	0	0	26	7	17	8	9	2	1	2	1	2	0	1		1
372	57	1	1.63	52	19.5717	0	1	0	14	7	5	1	1	0	0	0	0	1	0	0		1
373	45	1	1.69	58	20.3074	0	1	0	46	4	24	14	7	2	1	1	0	2	0	1		1
374	60	2	1.69	59	20.8086	1	0	0	50	7	19	2	10	3	1	2	1	1	1	1		1
375	60	1	1.79	69	21.5349	0	0	0	26	3	4	8	6	2	2	1	0	1	0	0		1
376	42	2	1.39	68	35.6867	0	0	0	46	5	9	12	7	2	1	1	0	2	0	1		1
377	51	1	1.5	79	35.1111	0	0	0	12	5	13	4	3	1	0	1	0	1	0	0		1
378	54	2	1.51	80	34.9277	0	0	0	20	2	9	10	9	1	0	1	1	3	1	2		1
379	56	2	1.56	45	18.9036	0	0	1	38	2	10	13	9	2	1	2	1	2	0	1		1
380	30	1	1.66	55	19.9594	0	1	0	36	3	7	10	4	1	1	1	0	1	0	0		1
381	37	2	1.66	56	20.5191	1	0	0	44	3	29	10	9	2	1	3	1	1	0	1		1
382	51	1	1.76	65	20.984	0	0	1	22	5	8	4	3	1	0	1	0	1	0	0		1
383	46	2	1.76	66	21.3669	0	0	0	40	7	15	7	5	1	2	1	0	1	0	0		1
384	52	2	1.42	72	35.1705	0	0	0	16	2	21	3	4	1	0	1	0	1	0	1		1
385	51	1	1.52	82	35.4917	0	0	0	10	6	6	4	3	1	0	1	0	1	0	0		1
386	60	1	1.57	46	18.662	0	0	1	12	7	16	4	2	1	0	0	0	0	0	1		1
387	55	2	1.57	47	19.433	0	0	0	20	3	14	4	5	2	2	0	0	1	0	0		1
388	26	1	1.67	56	20.0796	0	0	0	48	6	14	8	3	1	0	1	0	1	0	0		1
389	40	1	1.72	62	20.9573	0	1	0	16	2	9	10	8	1	2	3	1	1	0	0		1
390	45	1	1.79	68	21.2228	0	0	0	32	4	23	18	7	1	2	1	1	1	0	1		1
391	50	2	1.39	69	35.2045	0	0	0	52	4	8	5	7	1	2	1	2	1	0	0		1
392	53	1	1.49	78	35.1336	0	0	0	20	3	12	9	5	2	1	1	0	1	0	0		1
393	53	2	1.49	79	34.9975	0	0	0	36	6	27	13	6	1	1	1	0	2	0	1		1
394	53	1	1.59	47	18.591	0	0	0	34	7	18	4	3	1	0	1	0	1	0	0		1
395	33	2	1.59	50	20.0773	0	0	0	44	4	10	4	5	1	1	1	0	1	0	1		1
396	38	1	1.7	59	20.4152	0	0	1	40	7	29	3	10	2	1	2	1	2	1	1		1
397	42	2	1.7	60	20.898	0	0	0	28	4	8	10	5	1	1	1	0	1	0	1		1
398	48	2	1.75	65	21.2963	0	0	0	46	4	3	9	9	2	2	2	1	1	0	1		1
399	63	2	1.4	70	35.1962	0	0	0	14	2	11	18	3	1	1	0	0	1	0	0		1
400	53	1	1.5	81	36	1	1	0	32	5	16	17	7	2	1	1	0	2	0	1		1
401	47	1	1.48	83	37.8926	0	0	0	38	5	18	9	9	2	1	2	1	2	0	1		1
402	52	1	1.58	52	20.83	0	1	0	36	2	13	4	2	1	0	0	0	1	0	0		1
403	45	2	1.6	55	21.6713	0	0	0	36	6	27	2	8	2	1	2	1	1	0	1		1
404	36	2	1.67	61	21.9713	0	0	0	20	2	17	8	5	1	1	1	0	1	0	1		1
405	51	2	1.72	67	22.6627	0	0	0	30	4	3	8	5	2	1	1	0	0	0	1		1
406	48	1	1.43	77	37.6547	1	0	0	48	7	37	15	7	2	1	1	0	2	0	1		1
407	47	1	1.5	83	36.8889	0	0	0	26	3	9	2	6	1	2	1	1	1	0	0		1
408	39	2	1.5	44	19.9792	0	0	1	44	3	3	4	8	2	2	1	0	2	0	1		1
409	52	1	1.62	54	20.5761	0	0	0	30	2	23	2	3	1	0	1	0	1	0	0		1
410	37	2	1.62	56	21.5139	0	1	0	38	5	28	14	6	1	1	1	1	1	0	1		1
411	42	2	1.68	61	21.7181	1	0	0	18	7	32	10	7	1	1	2	1	1	0	1		1
412	49	2	1.74	68	22.4712	0	0	0	24	3	35	12	5	2	1	1	0	1	0	0		1
413	55	1	1.44	78	37.6157	0	0	0	22	4	5	16	5	1	1	1	0	1	0	1		1
414	53	1	1.51	83	36.4019	0	0	0	10	3	9	4	3	1	0	1	0	1	0	0		1
415	45	1	1.56	47	19.313	0	0	0	38	3	25	0	7	1	1	2	1	1	0	1		1
416	46	2	1.57	50	20.5761	0	0	0	36	7	26	2	8	2	2	1	1	1	0	1		1
417	63	2	1.63	55	20.9042	0	1	0	32	3	14	8	4	1	1	1	0	1	0	0		1
418	44	1	1.73	65	21.7181	0	0	0	40	6	14	12	7	1	2	1	0	1	1	1		1
419	45	2	1.74	67	22.1591	0	0	0	28	2	13	7	5	1	1	1	0	1	0	1		1
420	59	1	1.44	77	37.1335	0	0	0	30	4	18	6	5	1	1	1	0	1	0	1		1
421	58	2	1.44	76	36.9353	1	0	1	44	6	32	9	9	2	1	2	1	2	0	1		1
422	44	1	1.56	46	18.902	0	0	0	46	3	12	10	5	1	1	0	0	1	0	2		1
423	46	1	1.61	53	20.4467	0	0	0	14	4	32	5	8	2	2	1	1	2	0	0		1
424	37	1	1.66	58	21.048	0	1	0	28	2	21	3	4	1	1	1	0	1	0	0		1
425	49	2	1.66	60	21.8871	0	0	0	24	4	22	5	8	1	2	1	1	1	1	1		1
426	47	2	1.71	65	22.2753	1	0	0	42	7	30	11	6	2	1	1	0	1	0	1		1
427	53	1	1.42	76	37.6909	0	0	0	30	3	5	10	5	1	1	1	0	1	0	1		1
428	51	2	1.42	76	37.4844	1	0	1	38	3	3	5	4	1	0	1	0	1	0	1		1
429	40	2	1.5	80	35.796	0	0	0	4	7	25	10	9	2	1	2	1	2	0	1		1
430	33	2	1.56	46	19.2894	0	0	0	2	5	29	7	8	2	1	2	1	2	0	0		1
431	38	2	1.61	51	19.9594	0	0	0	14	7	14	2	8	3	2	1	0	2	0	0		1
432	44	2	1.67	58	20.9573	0	0	0	20	2	10	3	9	3	2	1	1	0	2	0		1
433	49	2	1.72	63	21.3859	0	0	0	26	2	7	13	10	2	2	2	1	1	0	2		1
434	53	1	1.42	72	35.7072	0	0	0	24	2	14	1	1	0	0	0	0	1	0	0		1
435	60	1	1.47	79	36.5588	0	0	0	52	4	14	7	5	1	1	1	0	1	0	1		1
436	55	1	1.54	85	35.8408	0	1	0	40	7	15	17	6	1	1	1	0	1	0	2		1
437	56	2	1.54	45	19.3821	0	0	0	16	3	10	3	3	1	0	1	0	1	0	0		1
438	43	2	1.59	52	20.8209	0	0	0	36	6	14	4	7	1	1	2	1	1	0	1		1
439	60	2	1.65	57	21.1073	0	0	0	24	2	9	12	4	1	1	1	0	1	0	0		1
440	58	2	1.7	62	21.551	0	0	1	42	4	16	14	7	1	1	2	1	1	0	1		1
441	36	1	1.8	72	22.2222	0	1	0	40	2	10	3	9	2	2	1	1	1	1	1		1
442	51	2	1.41	73	36.1231	0	0	0	26	3	14	8	4	1	2	0	0	1	0	0		1
443	38	2	1.46	78	36.8405	0	0	0	24	4	11	12	5	1	1	1	0	1	0	1		1
444	53	1	1.56	48	19.7239	0	0	0	12	4	5	3	0	0	0	0	0	0	0	0		1
445	50	1	1.61	54	20.8325	0	0	1	10	4	6	10	4	1	0	1	0	1	0	1		1
446	42	1	1.67	62	22.231	0	0	0	38	3	26	12	10	1	2	2	1	3	0	1		1
447	60	1	1.73	67	22.3863	0	0	0	26	2	16	4	2	1	0	0	0	1	0	0		1
448	60	1	1.78	74	23.3556	0	0	1	44	6	11	5	4	1	1	1	0	1	0	0		1
449	57	2	1.38	73	38.6327	0	1	0	12	5	27	7	7	1	2	1	1	1	0	1		1
450	40	1	1.49	84	37.8361	0	0	0	38	4	26	7	6	2	1	1	0	1	0	1		1
451	46	1	1.54	50	21.0828	0	1	0	46	5	38	11	6	2	1	1	0	1	0	1		1
452	50	1	1.59	55	21.7555	0	1	0	34	3	6	9	5	1	1	1	0	1	0	1		1
453	55	1	1.65	60	22.0386	1	0	1	42	6	28	10	8	1	1	2	1	2	0	1		1
454	36	2	1.65	62	22.8374	0	0	0	10	2	5	4	8	2	1	1	0	2	1	1		1
455	57	1	1.75	71	23.1837	0	0	1	28	4	29	18	7	1	0	2	1	2	0	1		1
456	58	1	1.8	77	23.7654	0	0	0	46	3	13	0	9	2	1	2	1	2	0	1		1
457	38	1	1.46	83	38.9379	0	1	0	34	3	33	5	5	1	1	1	0	1	0	1		1
458	44	1	1.51	47	20.6131	0	0	0	20	6	37	9	7	2	1	1	0	2	0	1		1
459	48	2	1.52	48	21.0962	1	0	0	16	4	6	3	3	1	1	0	0	1	0	0		1
460	53	1	1.62	59	22.4813	1	1	0	18	4	11	8	6	2	1	1	0	1	0	1		1
461	51	2	1.63	60	22.6757	0	0	0	16	3	11	13	2	1	1	0	0	0	0	0		1
462	40	1	1.73	69	23.0546	0	0	1	34	4	21	6	5	2	1	1	0	1	0	0		1
463	55	1	1.78	74	23.3556	0	0	0	24	2	17	2	1	0	0	0	0	1	0	0		1
464	37	1	1.43	71	39.6107	0	0	0	44	4	29	3	10	2	2	2	1	2	0	1		1
465	43	1	1.49	76	38.737	0	0	0	12	5	5	5	5	1	1	1	0	1	0	1		1
466	48	1	1.54	50	21.0828	1	0	1	40	5	5	10	7	2	1	1	0	1	0	2		1
467	39	2	1.54	52	22.151	0	1	0	18	3	19	3	2	1	0	0	0	1	0	0		1
468	49	1	1.65	61	22.4059	0	1	0	28	5	31	16	10	2	2	2	1	2	1	0		1
469	58	1	1.7	67	23.1834	1	0	0	14	7	12	20	8	2	1	1	1	1	0	2		1
470	59	1	1.76	72	23.2438	0	0	0	26	4	17	3	2	1	0	0	0	1	0	0		1
471	40	1	1.81	78	23.8088	0	0	0	12	6	19	12	5	2	1	0	0	1	0	1		1
472	46	1	1.47	73	38.4099	0	0	0	16	2	18	3	5	1	1	1	0	0	0	2		1
473	52	1	1.52	47	20.3428	0	1	1	12	4	0	3	9	2	2	1	1	1	0	2		1
474	58	2	1.52	50	21.9076	1	1	1	8	6	23	7	10	2	1	2	1	1	1	2		1
475	44	1	1.62	59	22.4813	0	0	0	50	5	12	4	3	1	0	0	0	1	0	1		1
476	49	1	1.68	64	22.6757	0	0	0	16	3	17	6	6	2	1	1	0	1	0	1		1
477	51	1	1.73	69	23.0546	0	0	0	48	5	6	3	2	1	0	0	0	1	0	0		1
478	46	2	1.73	71	23.9869	0	0	0	48	5	16	13	9	2	2	2	1	1	1	0		1
479	52	1	1.53	81	39.6107	0	0	0	24	5	8	3	3	1	1	0	0	0	0	1		1
480	46	1	1.49	76	38.737	0	0	0	36	4	34	17	7	2	2	1	0	1	0	1		1
481	39	2	1.5	47	21.2279	0	1	0	26	6	8	5	3	1	0	0	0	1	0	1		1
482	42	2	1.55	53	22.2656	0	0	0	26	2	7	5	10	2	1	2	1	2	1	1		1
483	62	1	1.65	62	22.7732	1	0	0	14	4	18	12	7	2	1	1	0	2	0	1		1
484	41	1	1.71	68	23.255	1	1	0	18	4	14	16	6	2	0	1	0	2	0	1		1
485	55	1	1.76	73	23.5666	1	0	0	44	7	24	11	8	1	2	1	1	2	0	1		1
486	51	2	1.76	74	23.8088	1	0	1	26	3	28	12	4	1	1	0	0	1	0	1		1
487	55	2	1.41	68	39.407	0	0	1	44	6	39	6	6	1	1	1	1	1	0	1		1
488	59	2	1.47	45	21.2084	0	0	0	32	2	8	3	6	1	2	1	0	1	0	1		1
489	44	2	1.52	50	21.9076	0	0	0	44	6	14	10	3	1	0	1	0	1	0	0		1
490	46	1	1.62	59	22.4813	0	1	0	14	3	18	6	4	1	1	1	0	1	0	0		1
491	39	1	1.68	65	23.03	1	0	0	34	4	13	11	4	1	1	1	0	1	0	0		1
492	43	1	1.74	71	23.4509	1	1	0	44	7	25	13	8	2	2	1	1	1	0	1		1
493	48	2	1.75	72	23.4568	0	1	0	22	2	23	8	5	1	1	0	0	2	0	1		1
494	53	1	1.46	81	37.9996	1	0	0	10	5	18	13	6	2	1	1	1	1	0	0		1
495	46	1	1.51	86	37.7176	0	0	0	12	5	6	4	4	1	0	1	0	1	0	1		1
496	39	1	1.57	52	21.0962	0	0	1	26	4	11	10	7	1	2	1	1	1	0	1		1
497	32	2	1.57	53	21.7193	0	0	0	50	6	32	3	9	2	2	2	1	1	0	1		1
498	38	1	1.67	62	22.231	0	0	0	38	3	22	4	6	2	1	0	0	2	0	1		1
499	59	2	1.69	63	22.1297	0	1	1	28	6	24	14	9	2	1	1	1	2	0	2		1
500	49	2	1.75	70	22.8395	0	0	0	12	6	25	13	5	1	1	1	0	2	0	0		1
501	55	1	1.45	79	37.5743	0	1	0	32	4	27	10	6	1	1	1	0	2	0	1		1
502	64	1	1.51	85	37.2791	0	0	0	52	7	6	15	4	1	0	1	0	1	0	1		1
503	48	1	1.56	49	20.1348	1	0	0	20	3	26	17	8	1	2	1	1	1	1	1		1
504	55	1	1.63	55	20.7008	0	0	0	38	7	11	16	9	1	3	1	1	1	0	2		1
505	56	2	1.63	56	21.2585	0	0	1	2	1	0	10	8	1	3	1	1	1	0	1		1
506	54	2	1.69	62	21.7994	0	1	0	16	7	20	8	3	1	0	1	0	1	0	0		1
507	52	1	1.79	71	22.1591	0	1	0	6	2	6	5	9	2	1	2	1	2	1	0		1
508	56	2	1.39	70	36.6512	0	1	0	34	3	25	2	1	0	1	0	0	0	0	0		1
509	48	2	1.46	78	36.4019	0	1	0	32	7	26	12	7	2	1	1	0	2	1	0		1
510	54	1	1.56	47	19.313	0	0	0	40	3	7	7	4	1	0	0	0	2	0	1		1
511	63	2	1.56	48	20.061	0	0	0	58	6	12	5	4	1	1	0	0	2	0	0		1
512	54	1	1.68	59	20.9042	0	0	1	32	2	17	5	7	1	3	1	1	0	0	1		1
513	37	2	1.68	60	21.3839	0	0	1	42	5	17	13	5	1	1	1	0	1	0	1		1
514	43	2	1.73	65	21.7776	0	0	0	50	3	17	1	6	1	1	2	1	1	0	0		1
515	49	1	1.43	75	36.6766	0	0	0	36	4	31	6	7	2	1	1	1	1	0	1		1
516	53	1	1.48	80	36.523	0	0	0	44	6	36	14	7	2	1	1	0	2	0	1		1
517	63	2	1.48	42	19.6506	0	1	0	26	2	4	3	3	1	1	0	0	1	0	0		1
518	52	2	1.54	47	20.1733	0	0	0	42	5	28	17	7	2	2	1	0	1	0	1		1
519	47	1	1.64	57	21.1927	0	0	0	58	2	6	16	6	2	1	1	0	1	0	1		1
520	44	1	1.69	63	22.0581	0	0	0	44	5	9	8	2	1	0	1	0	0	0	0		1
521	55	1	1.74	69	22.7903	0	0	0	4	2	19	20	8	2	2	1	0	1	1	1		1
522	54	1	1.79	74	23.0954	0	0	0	12	6	6	3	2	1	0	0	0	0	0	1		1
523	63	2	1.49	77	39.0625	0	1	0	42	3	15	6	9	2	1	2	1	2	0	1		1
524	40	1	1.49	86	38.737	0	0	0	32	6	10	5	2	1	0	0	0	1	0	0		1
525	33	1	1.56	51	20.9566	1	0	0	18	6	21	5	8	1	2	2	1	2	0	0		1
526	37	1	1.61	59	22.7615	0	1	0	22	2	11	5	4	1	0	1	0	1	0	1		1
527	43	2	1.61	60	23.2254	0	0	1	22	5	22	8	8	2	2	1	1	1	0	1		1
528	48	2	1.66	67	24.281	0	0	0	10	4	4	2	1	0	0	0	0	1	0	0		1
529	52	2	1.71	72	24.5351	0	0	0	50	4	25	3	7	2	0	2	1	1	0	1		1
530	39	2	1.76	77	24.7245	0	0	0	50	7	25	2	10	2	2	1	1	2	1	1		1
531	64	1	1.46	46	21.58	0	0	0	10	7	17	10	2	1	0	0	0	1	0	0		1
532	55	1	1.52	51	22.0741	0	0	1	38	5	18	12	6	2	2	1	0	1	0	0		1
533	46	1	1.57	57	23.1247	0	0	0	12	3	8	10	5	1	2	1	0	1	0	0		1
534	40	2	1.57	58	23.6244	1	1	0	34	4	12	7	5	1	2	0	0	2	0	0		1
535	45	1	1.67	67	24.0238	0	0	0	32	4	26	3	9	1	3	1	1	2	0	1		1
536	35	1	1.72	72	24.3375	0	0	0	38	2	14	3	3	1	0	1	0	1	0	0		1
537	42	1	1.77	77	24.5779	0	0	0	46	5	17	15	6	2	1	1	0	2	0	0		1
538	47	1	1.43	74	41.0778	0	0	0	12	3	6	13	3	2	0	0	0	1	0	0		1
539	57	1	1.48	48	21.9138	0	1	0	46	3	9	7	3	0	1	1	0	1	0	0		1
540	42	1	1.53	53	22.6409	0	0	1	10	5	13	11	9	2	1	2	1	2	0	1		1
541	34	1	1.58	58	23.2335	0	0	0	28	3	9	10	4	1	1	1	0	1	0	0		1
542	50	2	1.58	59	23.7118	1	0	1	50	3	33	4	7	1	2	1	1	1	0	1		1
543	58	2	1.63	64	24.093	0	0	0	24	2	17	3	2	0	0	0	0	1	0	1		1
544	45	2	1.68	71	25.0593	0	0	0	42	5	24	15	9	2	3	1	1	1	0	1		1
545	52	2	1.73	76	25.2493	0	0	0	22	2	29	4	4	1	1	1	0	1	0	0		1
546	39	1	1.45	75	40.4281	0	0	0	28	4	29	3	8	2	1	2	1	1	0	1		1
547	46	1	1.5	49	21.7778	0	1	0	42	8	34	7	8	2	1	2	1	2	0	0		1
548	52	2	1.5	50	22.4766	1	0	0	20	2	5	9	5	1	1	1	0	1	0	1		1
549	52	2	1.55	55	23.0469	1	0	1	40	5	11	10	4	1	1	1	0	1	0	0		1
550	44	1	1.65	66	24.2424	0	0	0	18	3	16	3	7	1	2	1	1	2	0	0		1
551	33	1	1.7	71	24.5675	0	0	0	40	4	13	16	5	1	1	1	1	1	0	0		1
552	39	1	1.76	76	24.5351	0	0	0	68	4	25	4	6	1	1	1	0	2	0	1		1
553	45	1	1.81	81	24.7245	0	0	0	8	3	2	10	8	1	3	1	1	1	0	1		1
554	57	2	1.41	71	40.3453	0	0	0	16	6	31	4	8	2	1	1	0	2	1	1		1
555	58	2	1.46	47	22.3674	0	1	0	18	4	23	1	3	1	0	0	0	2	0	0		1
	47.28±8.73	1.41±0.49	1.59±0.11	63.36±11.41	25.61±6.34	0.13±0.33	0.18±0.39	0.19±0.39	31.74±13.65	4.35±1.61	15.95±8.91	7.65±4.63	5.85±2.52	1.28±0.66	1.03±0.77	0.97±0.60	0.45±0.53	1.19±0.62	0.16±0.38	0.78±0.68
对照组
1	36	1	68	1.69	23.8087	0	0	0	8	0	7	1	2	1	0	0	0	1	0	0		2
2	52	1	74	1.76	23.8895	0	0	0	6	0	4	2	7	1	2	1	1	1	0	1		2
3	47	1	80	1.41	40.2394	0	0	1	10	0	7	0	1	0	0	0	0	1	0	0		2
4	36	1	44	1.46	20.6418	0	0	0	6	1	12	4	6	2	1	1	0	1	0	1		2
5	46	1	49	1.51	21.4903	0	0	1	6	1	18	5	8	1	1	1	2	2	0	1		2
6	54	1	54	1.56	22.1893	0	0	0	4	0	4	5	3	1	1	0	0	1	0	0		2
7	27	1	60	1.61	23.1473	0	1	0	8	0	5	4	2	1	0	0	0	1	0	0		2
8	23	1	65	1.66	23.5883	0	0	0	4	0	2	7	0	0	0	0	0	0	0	0		2
9	42	1	70	1.71	23.939	0	1	0	8	0	5	0	5	1	2	0	0	1	0	1		2
10	53	1	76	1.77	24.2587	1	0	0	12	0	9	3	6	1	2	0	0	1	1	1		2
11	36	1	82	1.42	40.6665	0	0	1	16	1	12	4	0	0	0	0	0	0	0	0		2
12	59	1	46	1.47	21.2874	0	0	0	2	0	7	6	2	1	0	0	0	1	0	0		2
13	47	1	51	1.52	22.0741	0	0	0	12	0	11	6	3	1	1	0	0	1	0	0		2
14	51	1	56	1.57	22.719	0	0	0	10	1	21	9	9	2	1	2	1	2	0	1		2
15	43	1	61	1.62	23.2434	0	0	0	4	0	3	0	2	1	0	0	0	1	0	0		2
16	47	1	68	1.68	24.093	0	1	0	8	0	6	1	3	1	1	0	0	1	0	0		2
17	41	1	73	1.73	24.3911	0	0	0	14	0	10	1	0	0	0	0	0	0	0	0		2
18	50	1	78	1.78	24.6181	1	0	0	18	0	8	4	2	1	0	0	0	1	0	0		2
19	43	1	42	1.43	20.5389	0	0	1	4	1	16	1	0	0	0	0	0	0	0	0		2
20	31	1	47	1.48	21.4573	0	0	0	8	0	12	7	1	1	0	0	0	0	0	0		2
21	40	1	52	1.53	22.2137	0	0	0	2	0	28	8	8	2	1	1	1	1	0	2		2
22	48	1	59	1.58	23.634	0	0	0	8	0	32	9	9	2	1	2	1	2	0	1		2
23	21	1	64	1.63	24.0882	0	0	0	14	0	6	1	4	1	1	0	0	1	0	1		2
24	29	1	69	1.7	23.8754	0	1	0	8	0	9	2	4	1	1	1	0	1	0	0		2
25	38	1	74	1.75	24.1633	0	0	0	6	0	4	2	2	1	0	0	0	1	0	0		2
26	46	1	79	1.4	40.3061	1	1	0	8	0	5	5	3	1	1	0	0	1	0	0		2
27	60	1	43	1.45	20.4518	0	0	1	2	1	18	6	8	1	3	0	1	2	0	1		2
28	49	2	70	1.8	21.6049	0	0	0	8	1	7	2	2	1	0	0	0	1	0	0		2
29	38	2	55	1.55	22.8928	0	0	0	6	0	2	9	4	1	0	0	0	1	0	2		2
30	44	2	60	1.6	23.4375	0	0	0	10	0	5	0	2	1	0	0	0	1	0	0		2
31	52	2	65	1.66	23.5883	0	0	0	12	0	25	5	7	1	1	1	1	2	0	1		2
32	48	1	70	1.71	23.939	0	0	0	16	0	6	2	2	1	1	0	0	0	0	0		2
33	21	1	76	1.76	24.5351	0	0	1	12	0	2	4	0	0	0	0	0	0	0	0		2
34	40	1	82	1.41	41.2454	1	0	0	6	0	7	5	2	1	0	0	0	1	0	0		2
35	57	1	46	1.46	21.58	1	0	0	10	1	17	6	7	1	1	1	1	1	0	2		2
36	46	2	51	1.51	22.3674	0	1	0	8	0	6	8	0	0	0	0	0	0	0	0		2
37	39	2	56	1.56	23.0112	0	0	0	10	1	23	9	2	1	0	0	0	1	0	0		2
38	42	2	62	1.63	23.3355	0	0	0	10	0	7	0	3	1	1	1	0	0	0	0		2
39	50	1	67	1.68	23.7387	0	0	1	8	0	11	1	3	1	1	0	0	1	0	0		2
40	49	1	73	1.73	24.3911	0	0	0	2	0	13	2	6	2	2	0	0	2	0	0		2
41	42	1	78	1.78	24.6181	0	0	0	6	0	6	4	1	0	0	0	0	1	0	0		2
42	50	1	42	1.43	20.5389	0	0	0	8	0	8	5	3	1	2	0	0	0	0	0		2
43	57	2	78	1.66	28.306	1	0	0	6	0	22	6	6	1	1	1	1	1	0	1		2
44	55	2	47	1.77	15.0021	0	0	0	4	1	33	16	9	1	3	1	1	1	1	1		2
45	37	2	54	1.44	26.0417	0	1	0	6	0	7	8	1	1	0	0	0	0	0	0		2
46	37	2	60	1.5	26.6667	0	0	1	8	0	9	0	1	0	0	0	0	1	0	0		2
47	45	1	67	1.55	27.8876	0	0	1	12	0	3	1	5	2	1	0	0	2	0	0		2
48	61	1	72	1.61	27.7767	1	0	0	4	0	6	2	7	2	1	1	0	2	0	1		2
49	26	1	78	1.68	27.6361	0	0	0	8	0	9	3	4	2	0	1	0	1	0	0		2
50	39	2	54	1.74	17.8359	1	0	0	12	1	2	1	3	1	0	1	0	1	0	0		2
51	48	2	49	1.4	25	0	0	0	8	0	3	5	2	1	1	0	0	0	0	0		2
52	58	2	54	1.45	25.6837	0	0	0	12	0	6	7	9	1	3	1	1	2	0	1		2
53	49	2	60	1.51	26.3146	0	0	0	8	1	9	8	4	1	1	0	0	1	0	1		2
54	57	1	67	1.58	26.8386	0	0	0	2	0	2	9	2	0	0	1	0	1	0	0		2
55	46	1	72	1.63	27.0993	0	0	0	6	0	5	1	1	0	1	0	0	0	0	0		2
56	49	1	79	1.68	27.9904	0	0	1	10	0	8	2	1	0	0	0	0	1	0	0		2
57	46	1	43	1.74	14.2027	0	1	0	4	0	9	3	4	1	0	1	1	1	0	0		2
58	30	2	49	1.4	25	0	0	0	10	0	2	4	1	0	0	0	0	1	0	0		2
59	50	2	54	1.47	24.9896	0	0	0	8	0	5	5	4	1	1	1	0	1	0	0		2
60	50	2	61	1.52	26.4024	0	0	0	12	1	8	7	5	1	1	1	1	1	0	0		2
61	54	1	66	1.58	26.4381	1	0	0	4	0	12	8	6	1	1	1	1	1	0	1		2
62	35	1	71	1.63	26.7229	0	0	0	10	0	11	3	0	0	0	0	0	0	0	0		2
63	25	1	77	1.68	27.2817	0	0	0	6	0	6	1	4	1	1	0	1	1	0	0		2
64	48	1	62	1.73	20.7157	0	0	0	4	0	15	2	5	1	1	1	1	1	0	0		2
65	58	2	57	1.79	17.7897	0	0	0	4	0	1	3	6	2	1	1	1	1	0	0		2
66	49	2	53	1.44	25.5594	0	1	0	12	1	4	4	1	0	0	0	0	1	0	0		2
67	31	2	60	1.49	27.0258	0	0	0	4	0	7	5	2	1	0	1	0	0	0	0		2
68	51	1	65	1.54	27.4077	0	0	0	8	0	10	7	6	1	2	0	1	1	0	1		2
69	57	1	71	1.61	27.3909	1	0	0	6	0	20	9	9	1	3	1	1	1	0	2		2
70	44	1	76	1.66	27.5802	0	0	1	8	0	13	1	4	1	0	1	0	1	0	1		2
71	58	1	81	1.73	27.0641	0	0	0	4	0	11	0	5	2	0	1	0	1	0	1		2
72	36	2	46	1.79	14.3566	0	0	0	6	0	16	2	5	1	1	1	1	1	0	0		2
73	45	2	51	1.44	24.5949	0	0	0	10	0	2	3	3	1	1	0	0	1	0	0		2
74	59	2	57	1.51	24.9989	0	0	0	4	0	26	18	8	2	2	1	1	2	0	0		2
75	40	2	62	1.56	25.4767	0	0	0	8	0	8	5	1	0	1	0	0	0	0	0		2
76	41	1	67	1.62	25.5296	0	0	0	12	0	11	1	1	0	0	0	0	0	0	1		2
77	47	1	74	1.67	26.5338	0	0	0	8	0	14	8	5	1	1	1	0	1	0	1		2
78	50	1	80	1.72	27.0416	1	0	1	6	0	17	9	6	1	2	1	1	1	0	0		2
79	22	2	44	1.77	14.0445	0	0	0	8	0	6	0	3	1	0	1	0	1	0	0		2
80	18	2	51	1.43	24.9401	0	0	0	8	0	1	1	1	0	1	0	0	0	0	0		2
81	51	2	56	1.48	25.5661	0	1	0	2	0	4	3	0	0	0	0	0	0	0	0		2
82	47	2	62	1.53	26.4855	0	0	0	6	1	19	9	8	1	2	2	1	1	1	0		2
83	55	1	68	1.6	26.5625	1	0	1	10	0	9	5	7	2	2	1	0	2	0	0		2
84	28	1	74	1.65	27.1809	0	0	0	12	0	12	6	0	0	0	0	0	0	0	0		2
85	35	1	80	1.7	27.6817	0	0	0	8	0	5	2	3	1	0	1	0	1	0	0		2
86	43	1	45	1.76	14.5274	0	0	0	4	0	8	9	2	1	0	0	0	1	0	0		2
87	58	2	51	1.41	25.6526	0	0	0	6	0	21	12	10	2	1	3	1	1	1	1		2
88	24	2	57	1.46	26.7405	0	0	0	2	0	2	1	1	0	0	1	0	0	0	0		2
89	38	2	64	1.52	27.7008	0	0	0	6	0	4	2	3	2	1	0	0	0	0	0		2
90	41	1	70	1.87	20.0177	0	0	0	10	1	7	4	6	1	1	1	1	2	0	0		2
91	49	1	75	1.62	28.578	1	0	1	6	0	21	5	8	2	1	2	1	1	0	1		2
92	41	1	82	1.67	29.4023	0	1	0	4	0	5	6	0	0	0	0	0	0	0	0		2
93	39	1	46	1.74	15.1936	0	0	1	6	0	16	7	0	0	0	0	0	0	0	0		2
94	38	2	51	1.79	15.9171	0	0	0	8	1	7	2	1	1	0	0	0	0	0	0		2
95	50	2	58	1.44	27.9707	0	0	0	4	0	22	9	7	2	2	1	0	1	0	1		2
96	54	2	63	1.5	28	0	0	1	8	0	2	1	6	2	0	2	0	1	0	1		2
97	38	2	68	1.55	28.3039	0	1	0	4	0	5	2	2	1	0	0	0	1	0	0		2
98	35	1	73	1.6	28.5156	0	0	0	6	1	9	3	4	0	1	0	1	1	0	1		2
99	43	1	80	1.65	29.3848	0	1	1	4	0	11	4	2	1	1	0	0	0	0	0		2
100	52	1	44	1.71	15.0474	1	0	0	6	0	24	13	10	2	2	2	1	1	1	1		2
101	24	1	49	1.76	15.8187	0	0	1	8	1	17	6	1	0	0	0	0	1	0	0		2
102	22	2	55	1.41	27.6646	0	0	0	8	0	6	3	1	0	1	0	0	0	0	0		2
103	39	2	60	1.46	28.1479	0	0	0	4	0	9	3	3	1	0	0	0	1	0	1		2
104	56	2	66	1.53	28.1943	0	0	0	8	0	3	0	8	1	3	1	1	1	0	1		2
105	44	1	72	1.88	20.3712	1	1	0	4	0	6	1	2	1	0	0	0	0	0	1		2
106	48	1	77	1.63	28.9811	0	0	1	4	0	9	2	1	0	1	0	0	0	0	0		2
107	37	2	82	1.69	28.7105	0	0	0	2	0	12	3	3	1	1	0	0	1	0	0		2
108	19	1	46	1.74	15.1936	0	0	0	6	0	11	5	1	1	0	0	0	0	0	0		2
109	53	2	53	1.79	16.5413	1	0	1	12	1	18	2	5	1	2	1	0	1	0	0		2
110	56	2	58	1.44	27.9707	0	0	0	6	0	15	3	4	1	0	1	0	1	0	1		2
111	34	2	63	1.5	28	0	0	0	4	0	1	2	3	1	1	1	0	0	0	0		2
112	42	2	70	1.55	29.1363	0	0	0	8	1	4	4	2	1	1	0	0	0	0	0		2
	43.34±10.39	1.39±0.49	62.71±11.60	1.60±0.13	24.64±4.98	0.14±0.35	0.13±0.33	0.18±0.38	7.36±3.32	0.19±0.39	9.90±6.95	4.30±3.41	3.64±2.73	0.92±0.63	0.76±0.83	0.48±0.64	0.27±0.46	0.82±0.60	0.04±0.21	0.35±0.55
